# Supplementary material
Source: Research Square preprint supplement (doi:10.21203/rs.3.rs-9713297/v1)
Supplement: Supplementary file 1 [file 655619e7f5d912eddbead6ec.xlsx]

## Sheet: Supplementary Table S1
Supplementary Table S1. Multicollinearity diagnostics for covariates included in the fully adjusted Cox model
	Variable	Df	GVIF	GVIF^(1/(2*Df))
Age	Age	1	1.38957392516349	1.17880190242614
BMI	BMI	1	1.16065010709246	1.07733472379408
Race	Race	4	1.21839039744594	1.02499868551044
Gender	Gender	1	1.08151820882212	1.0399606765749
Ca	Ca	1	1.07589867631307	1.03725535733158
Ckd	Ckd	1	1.34389147998672	1.15926333504805
Aki	Aki	1	1.36961500374442	1.1703055172665
T2dm	T2dm	1	1.20772488159125	1.09896536869514
Copd	Copd	1	1.08199699025566	1.04019084318968
Mi	Mi	1	1.11206194154877	1.05454347541899
Hf	Hf	1	1.25966565700332	1.12234827794376
WBC	WBC	1	1.0939545021521	1.04592279932704
RBC	RBC	1	7.07078957779733	2.65909563156298
PLT	PLT	1	1.29314699967032	1.13716621461874
Cr	Cr	1	2.37444	1.54092201864857
BUN	BUN	1	2.55120143880485	1.59724808304936
Na	Na	1	1.10297385985881	1.05022562331092
Hb	Hb	1	6.91900223025193	2.63039963318351
Calcium	Calcium	1	1.08322313063179	1.04078005872124
Hr	Hr	1	1.17582329000862	1.08435385829932
Nbpm	Nbpm	1	1.01589838264943	1.0079178451885
Rr	Rr	1	1.13276080216904	1.06431236118399
Spo2	Spo2	1	1.01906324011556	1.00948662205874
Temperaturef	Temperaturef	1	1.03983781781589	1.01972438326044
Sofa	Sofa	1	1.89071105204174	1.37503129129549
Gcs	Gcs	1	1.16514443004829	1.07941856110051
Vasopressor	Vasopressor	1	1.26786	1.12599222668543
Glucocorticoids	Glucocorticoids	1	1.04980994037908	1.02460233279994
Antihypertensive	Antihypertensive	1	1.12700180086262	1.06160341034805
Legend: Multicollinearity was evaluated using the generalized variance inflation factor adjusted for degrees of freedom [GVIF^(1/(2×Df))]. Values below the prespecified threshold indicated no substantial multicollinearity among covariates

## Sheet: Supplementary Table S2
Supplementary Table S2. Proportional hazards assumption tests for Cox models treating LAR as a continuous variable.
Model	chisq	df	p	Variable
Unadjusted Model	1.07222581205777	1	0.3	LAR
Unadjusted Model	1.07222581205777	1	0.3	GLOBAL
Model 1	1.14928255866611	1	0.284	LAR
Model 1	0.141490369038997	1	0.707	Age
Model 1	0.980694749459344	1	0.322	BMI
Model 1	3.15360776627121	4	0.532	Race
Model 1	0.39504402808218	1	0.53	Gender
Model 1	5.58674342960247	8	0.693	GLOBAL
Model 2	1.37004844335911	1	0.242	LAR
Model 2	0.107833210879143	1	0.743	Age
Model 2	1.01428454320313	1	0.314	BMI
Model 2	3.1802204574783	4	0.528	Race
Model 2	0.406175100128068	1	0.524	Gender
Model 2	0.206236721587162	1	0.65	Ca
Model 2	0.177268525736074	1	0.674	Ckd
Model 2	1.07909984602142	1	0.299	Aki
Model 2	2.20231825018198	1	0.138	T2dm
Model 2	2.94196372163189	1	0.086	Copd
Model 2	1.38581324082155	1	0.239	Mi
Model 2	0.177342900584689	1	0.674	Hf
Model 2	15.3325907464349	15	0.428	GLOBAL
Model 3	1.37957834779431	1	0.24	LAR
Model 3	0.0483333418300134	1	0.826	Age
Model 3	0.942128485304397	1	0.332	BMI
Model 3	3.20514594621289	4	0.524	Race
Model 3	0.439636536209206	1	0.507	Gender
Model 3	0.258072274260035	1	0.611	Ca
Model 3	0.126690161730646	1	0.722	Ckd
Model 3	1.08456188977007	1	0.298	Aki
Model 3	2.4787153873449	1	0.115	T2dm
Model 3	2.91978896190566	1	0.087	Copd
Model 3	1.35114789507327	1	0.245	Mi
Model 3	0.197835044936022	1	0.656	Hf
Model 3	0.377732742773397	1	0.539	WBC
Model 3	0.715607222932838	1	0.398	RBC
Model 3	4.19223864854357	1	0.041	PLT
Model 3	0.46804059705562	1	0.494	Cr
Model 3	0.00290557501174126	1	0.957	BUN
Model 3	0.295356240798911	1	0.587	Na
Model 3	0.119195258925587	1	0.73	Hb
Model 3	3.21270227952793	1	0.073	Calcium
Model 3	30.1872871593711	23	0.144	GLOBAL
Model 4	1.32500206845085	1	0.25	LAR
Model 4	0.0484850811249622	1	0.826	Age
Model 4	0.837904306702457	1	0.36	BMI
Model 4	3.28577130736728	4	0.511	Race
Model 4	0.440923785225156	1	0.507	Gender
Model 4	0.237478805150293	1	0.626	Ca
Model 4	0.131075419786734	1	0.717	Ckd
Model 4	1.19355630365773	1	0.275	Aki
Model 4	2.2975275812048	1	0.13	T2dm
Model 4	2.78877914518116	1	0.095	Copd
Model 4	1.48681589832066	1	0.223	Mi
Model 4	0.123658361651795	1	0.725	Hf
Model 4	0.303744160197131	1	0.582	WBC
Model 4	0.85533618951434	1	0.355	RBC
Model 4	3.70675480073538	1	0.054	PLT
Model 4	0.506199511366892	1	0.477	Cr
Model 4	3.52434955106775e-05	1	0.995	BUN
Model 4	0.291980027873725	1	0.589	Na
Model 4	0.16615732593063	1	0.684	Hb
Model 4	3.23910468363874	1	0.072	Calcium
Model 4	2.2100150378281	1	0.137	Hr
Model 4	4.02706545853315e-05	1	0.995	Nbpm
Model 4	1.72392051604506	1	0.189	Rr
Model 4	0.15000381511245	1	0.699	Spo2
Model 4	0.310738675215832	1	0.577	Temperaturef
Model 4	4.20213002626452	1	0.04	Sofa
Model 4	0.00772084976257115	1	0.93	Gcs
Model 4	40.3564253379287	30	0.098	GLOBAL
Model 5	1.07311217585982	1	0.3	LAR
Model 5	0.0449485789516005	1	0.832	Age
Model 5	0.725567963776003	1	0.394	BMI
Model 5	3.26822903146553	4	0.514	Race
Model 5	0.481369194146637	1	0.488	Gender
Model 5	0.258766304435075	1	0.611	Ca
Model 5	0.146537813017328	1	0.702	Ckd
Model 5	1.25718203343687	1	0.262	Aki
Model 5	2.05419612506535	1	0.152	T2dm
Model 5	2.77858802555002	1	0.096	Copd
Model 5	1.39112057917675	1	0.238	Mi
Model 5	0.162197381193566	1	0.687	Hf
Model 5	0.273653474515319	1	0.601	WBC
Model 5	0.970193211386263	1	0.325	RBC
Model 5	3.51918976661103	1	0.061	PLT
Model 5	0.568954216883297	1	0.451	Cr
Model 5	0.00354484546862089	1	0.953	BUN
Model 5	0.170483747547411	1	0.68	Na
Model 5	0.164121862967664	1	0.685	Hb
Model 5	3.20091422534961	1	0.074	Calcium
Model 5	2.3210685106155	1	0.128	Hr
Model 5	0.000205533457504348	1	0.989	Nbpm
Model 5	1.67969890717792	1	0.195	Rr
Model 5	0.12089395806244	1	0.728	Spo2
Model 5	0.313498145075066	1	0.576	Temperaturef
Model 5	3.84095075666459	1	0.05	Sofa
Model 5	0.0315297730491572	1	0.859	Gcs
Model 5	2.14516489337256	1	0.143	Vasopressor
Model 5	11.1473456438511	1	<0.001	Glucocorticoids
Model 5	27.1833941746386	1	<0.001	Antihypertensive
Model 5	78.6630083889478	33	<0.001	GLOBAL
Legend: Schoenfeld residual-based tests were used to assess the proportional hazards assumption for each covariate and the global model across progressively adjusted Cox models.

## Sheet: Supplementary Table S3
Supplementary Table S3. Proportional hazards assumption tests for Cox models treating LAR as a categorical variable.
Model	chisq	df	p	Variable
Unadjusted Model	0.376718402571617	2	0.828	Group
Unadjusted Model	0.376718402571617	2	0.828	GLOBAL
Model 1	0.371925794886423	2	0.83	Group
Model 1	0.166546313245884	1	0.683	Age
Model 1	1.01629282987784	1	0.313	BMI
Model 1	3.17756690507973	4	0.529	Race
Model 1	0.435476312740666	1	0.509	Gender
Model 1	4.87776251668707	9	0.845	GLOBAL
Model 2	0.456277938187492	2	0.796	Group
Model 2	0.128720091204238	1	0.72	Age
Model 2	1.04710800487016	1	0.306	BMI
Model 2	3.19178806987448	4	0.526	Race
Model 2	0.43425365965858	1	0.51	Gender
Model 2	0.196396275595915	1	0.658	Ca
Model 2	0.167710812041597	1	0.682	Ckd
Model 2	1.11169858704683	1	0.292	Aki
Model 2	2.20247531291292	1	0.138	T2dm
Model 2	2.93410979293332	1	0.087	Copd
Model 2	1.36219138299244	1	0.243	Mi
Model 2	0.200849463151075	1	0.654	Hf
Model 2	14.4947525734072	16	0.562	GLOBAL
Model 3	0.561739024598334	2	0.755	Group
Model 3	0.0625276298881186	1	0.803	Age
Model 3	0.980195109714468	1	0.322	BMI
Model 3	3.20778257904071	4	0.524	Race
Model 3	0.468719740115917	1	0.494	Gender
Model 3	0.243100656605771	1	0.622	Ca
Model 3	0.111152044506432	1	0.739	Ckd
Model 3	1.09584244265397	1	0.295	Aki
Model 3	2.48535382944194	1	0.115	T2dm
Model 3	2.92651650565563	1	0.087	Copd
Model 3	1.34607193518948	1	0.246	Mi
Model 3	0.211258721282725	1	0.646	Hf
Model 3	0.356564314795084	1	0.55	WBC
Model 3	0.70039091259034	1	0.403	RBC
Model 3	4.33208311671524	1	0.037	PLT
Model 3	0.44905217859837	1	0.503	Cr
Model 3	0.00192477224310522	1	0.965	BUN
Model 3	0.337800247076722	1	0.561	Na
Model 3	0.113492820860651	1	0.736	Hb
Model 3	3.23716002689475	1	0.072	Calcium
Model 3	29.9033802081628	24	0.188	GLOBAL
Model 4	0.543143201096515	2	0.762	Group
Model 4	0.0519946025044147	1	0.82	Age
Model 4	0.862023101070464	1	0.353	BMI
Model 4	3.2938502311055	4	0.51	Race
Model 4	0.473773095325674	1	0.491	Gender
Model 4	0.234530880318236	1	0.628	Ca
Model 4	0.115594022569431	1	0.734	Ckd
Model 4	1.20921786727208	1	0.271	Aki
Model 4	2.32715939254378	1	0.127	T2dm
Model 4	2.79365550850597	1	0.095	Copd
Model 4	1.52337970445593	1	0.217	Mi
Model 4	0.118825426068576	1	0.73	Hf
Model 4	0.304084358909877	1	0.581	WBC
Model 4	0.876663955071738	1	0.349	RBC
Model 4	3.73719015964249	1	0.053	PLT
Model 4	0.494348627999359	1	0.482	Cr
Model 4	0.000316027378327027	1	0.986	BUN
Model 4	0.335922850526346	1	0.562	Na
Model 4	0.171004174081392	1	0.679	Hb
Model 4	3.31602679647287	1	0.069	Calcium
Model 4	2.22024520328335	1	0.136	Hr
Model 4	8.84126304427382e-05	1	0.992	Nbpm
Model 4	1.74718981843003	1	0.186	Rr
Model 4	0.144801964449182	1	0.704	Spo2
Model 4	0.294839358761231	1	0.587	Temperaturef
Model 4	4.2245762429329	1	0.04	Sofa
Model 4	0.00758217729638845	1	0.931	Gcs
Model 4	41.4228908845596	31	0.1	GLOBAL
Model 5	0.475781516170713	2	0.788	Group
Model 5	0.0503628602572222	1	0.822	Age
Model 5	0.755079321634882	1	0.385	BMI
Model 5	3.27082504779375	4	0.514	Race
Model 5	0.496255903460343	1	0.481	Gender
Model 5	0.24403061488715	1	0.621	Ca
Model 5	0.133777037991283	1	0.715	Ckd
Model 5	1.25368934452709	1	0.263	Aki
Model 5	2.08071880593664	1	0.149	T2dm
Model 5	2.80216257814766	1	0.094	Copd
Model 5	1.44471350975903	1	0.229	Mi
Model 5	0.163023347999748	1	0.686	Hf
Model 5	0.27387948803471	1	0.601	WBC
Model 5	0.998033955798908	1	0.318	RBC
Model 5	3.56111737038147	1	0.059	PLT
Model 5	0.566687984416333	1	0.452	Cr
Model 5	0.00146782990919432	1	0.969	BUN
Model 5	0.208822240280697	1	0.648	Na
Model 5	0.171892685148062	1	0.678	Hb
Model 5	3.23966923150961	1	0.072	Calcium
Model 5	2.30892881077881	1	0.129	Hr
Model 5	0.000178731903857352	1	0.989	Nbpm
Model 5	1.69504483441175	1	0.193	Rr
Model 5	0.121343185566399	1	0.728	Spo2
Model 5	0.293862773769078	1	0.588	Temperaturef
Model 5	3.89416080332707	1	0.048	Sofa
Model 5	0.0289144160728449	1	0.865	Gcs
Model 5	2.13867203567875	1	0.144	Vasopressor
Model 5	11.0221888192488	1	<0.001	Glucocorticoids
Model 5	27.3879146717104	1	<0.001	Antihypertensive
Model 5	80.1453664729176	34	<0.001	GLOBAL
Legend: Schoenfeld residual-based tests were used to assess the proportional hazards assumption for LAR tertile models and corresponding covariates.

## Sheet: Supplementary Table S4
Supplementary Table S4. Full Cox regression results for LAR analyzed as a continuous variable.
**Characteristic**	**HR**	**95% CI**	**p-value**	**HR**	**95% CI**	**p-value**	**HR**	**95% CI**	**p-value**	**HR**	**95% CI**	**p-value**	**HR**	**95% CI**	**p-value**	**HR**	**95% CI**	**p-value**
LAR	1.55	1.38, 1.75	<0.001	1.54	1.36, 1.74	<0.001	1.42	1.25, 1.62	<0.001	1.4	1.23, 1.60	<0.001	1.25	1.09, 1.44	0.001	1.24	1.08, 1.42	0.003
Age				1.03	1.02, 1.03	<0.001	1.02	1.01, 1.03	<0.001	1.02	1.02, 1.03	<0.001	1.03	1.02, 1.04	<0.001	1.03	1.02, 1.04	<0.001
BMI				1	0.99, 1.01	0.6	0.99	0.98, 1.01	0.3	1	0.98, 1.01	0.6	1	0.98, 1.01	0.4	1	0.98, 1.01	0.5
Race
Asian
Black				0.8	0.33, 1.93	0.6	0.77	0.32, 1.86	0.6	0.89	0.37, 2.18	0.8	0.82	0.33, 2.00	0.7	0.78	0.32, 1.92	0.6
Hispanic				1.2	0.44, 3.25	0.7	1.22	0.45, 3.32	0.7	1.35	0.49, 3.69	0.6	1.24	0.45, 3.39	0.7	1.17	0.43, 3.19	0.8
Other				1.75	0.77, 3.96	0.2	1.74	0.77, 3.95	0.2	2.03	0.89, 4.67	0.094	1.93	0.84, 4.43	0.12	1.92	0.84, 4.40	0.12
White				1.34	0.60, 3.02	0.5	1.3	0.58, 2.94	0.5	1.43	0.63, 3.26	0.4	1.31	0.58, 2.99	0.5	1.29	0.56, 2.93	0.6
Gender
Female
Male				0.87	0.72, 1.04	0.13	0.83	0.69, 1.00	0.05	0.84	0.69, 1.01	0.066	0.83	0.68, 1.00	0.053	0.85	0.70, 1.03	0.093
Ca
No
Yes							1.35	1.06, 1.73	0.015	1.29	1.01, 1.66	0.041	1.28	1.00, 1.64	0.052	1.22	0.95, 1.56	0.12
Ckd
No
Yes							1.05	0.84, 1.32	0.7	0.87	0.69, 1.10	0.2	0.9	0.71, 1.14	0.4	0.9	0.71, 1.15	0.4
Aki
No
Yes							1.78	1.42, 2.22	<0.001	1.47	1.16, 1.86	0.001	1.3	1.03, 1.66	0.03	1.37	1.08, 1.75	0.01
T2dm
No
Yes							0.9	0.73, 1.11	0.3	0.85	0.69, 1.06	0.2	0.87	0.70, 1.08	0.2	0.9	0.72, 1.12	0.3
Copd
No
Yes							1.15	0.92, 1.44	0.2	1.24	0.98, 1.56	0.067	1.19	0.95, 1.50	0.13	1.2	0.95, 1.51	0.12
Mi
No
Yes							1.05	0.81, 1.35	0.7	1.14	0.88, 1.46	0.3	1.11	0.86, 1.43	0.4	1.05	0.81, 1.36	0.7
Hf
No
Yes							1.24	1.01, 1.53	0.038	1.15	0.93, 1.42	0.2	1.16	0.94, 1.43	0.2	1.22	0.99, 1.51	0.067
WBC										1.01	1.00, 1.01	0.065	1	1.00, 1.01	0.3	1	1.0, 1.01	0.6
RBC										0.8	0.59, 1.09	0.2	0.87	0.64, 1.18	0.4	0.88	0.65, 1.19	0.4
PLT										1	1.00, 1.00	0.13	1	1.00, 1.00	0.6	1	1.00, 1.00	0.4
Cr										1.03	0.96, 1.10	0.4	1	0.93, 1.08	>0.9	0.98	0.91, 1.06	0.6
BUN										1.01	1.00, 1.01	0.011	1	1.00, 1.01	0.037	1	1.00, 1.01	0.049
Na										0.97	0.96, 0.98	<0.001	0.97	0.96, 0.98	<0.001	0.97	0.96, 0.98	<0.001
Hb										0.99	0.89, 1.10	0.8	0.97	0.87, 1.08	0.6	0.96	0.87, 1.07	0.5
Calcium										1.19	1.09, 1.30	<0.001	1.2	1.10, 1.32	<0.001	1.19	1.09, 1.30	<0.001
Hr													1.01	1.00, 1.01	0.008	1.01	1.00, 1.01	0.006
Nbpm													1	1.00, 1.00	0.6	1	1.00, 1.00	0.6
Rr													1	0.99, 1.02	0.6	1	0.99, 1.02	0.5
Spo2													1	0.99, 1.01	0.7	1	0.99, 1.01	0.7
Temperaturef													1.01	0.98, 1.05	0.5	1.01	0.98, 1.05	0.4
Sofa													1.07	1.03, 1.10	<0.001	1.05	1.02, 1.09	0.002
Gcs													1.01	0.98, 1.04	0.7	1	0.97, 1.03	0.8
Vasopressor
1
No																0.66	0.49, 0.89	0.006
Glucocorticoids
1
No																0.88	0.73, 1.07	0.2
Antihypertensive
1
No																2.03	1.62, 2.54	<0.001
Legend: Hazard ratios were estimated for log-transformed LAR as a continuous variable across unadjusted and progressively adjusted Cox models.

## Sheet: Supplementary Table S5
Supplementary Table S5. Full Cox regression results for LAR analyzed according to tertiles.
**Characteristic**	**HR**	**95% CI**	**p-value**	**HR**	**95% CI**	**p-value**	**HR**	**95% CI**	**p-value**	**HR**	**95% CI**	**p-value**	**HR**	**95% CI**	**p-value**	**HR**	**95% CI**	**p-value**
Group
LAR (≤-0.71)
LAR (-0.71--0.11)	1.59	1.24, 2.03	<0.001	1.55	1.21, 1.98	<0.001	1.44	1.12, 1.84	0.004	1.47	1.14, 1.88	0.003	1.43	1.11, 1.84	0.005	1.38	1.07, 1.77	0.013
LAR (>-0.11)	2.04	1.61, 2.58	<0.001	1.94	1.53, 2.46	<0.001	1.71	1.34, 2.18	<0.001	1.71	1.34, 2.18	<0.001	1.42	1.10, 1.83	0.008	1.36	1.06, 1.77	0.018
Age				1.03	1.02, 1.03	<0.001	1.02	1.01, 1.03	<0.001	1.02	1.02, 1.03	<0.001	1.03	1.02, 1.04	<0.001	1.03	1.02, 1.04	<0.001
BMI				1	0.99, 1.01	0.6	0.99	0.98, 1.01	0.3	1	0.98, 1.01	0.5	0.99	0.98, 1.01	0.4	1	0.98, 1.01	0.5
Race
Asian
Black				0.79	0.33, 1.89	0.6	0.76	0.32, 1.84	0.5	0.89	0.36, 2.17	0.8	0.81	0.33, 1.97	0.6	0.78	0.32, 1.91	0.6
Hispanic				1.21	0.45, 3.27	0.7	1.23	0.45, 3.34	0.7	1.35	0.49, 3.71	0.6	1.24	0.45, 3.39	0.7	1.16	0.43, 3.19	0.8
Other				1.65	0.73, 3.73	0.2	1.65	0.73, 3.74	0.2	1.94	0.85, 4.46	0.12	1.87	0.82, 4.28	0.14	1.87	0.82, 4.27	0.14
White				1.28	0.57, 2.89	0.5	1.24	0.55, 2.80	0.6	1.37	0.60, 3.11	0.5	1.26	0.56, 2.88	0.6	1.24	0.55, 2.83	0.6
Gender
Female
Male				0.86	0.72, 1.04	0.12	0.82	0.68, 0.99	0.04	0.84	0.69, 1.01	0.07	0.83	0.68, 1.00	0.053	0.85	0.70, 1.02	0.087
Ca
No
Yes							1.39	1.09, 1.78	0.008	1.33	1.04, 1.70	0.024	1.31	1.02, 1.67	0.035	1.23	0.96, 1.58	0.1
Ckd
No
Yes							1.06	0.85, 1.33	0.6	0.88	0.70, 1.12	0.3	0.91	0.72, 1.16	0.4	0.91	0.72, 1.16	0.4
Aki
No
Yes							1.83	1.46, 2.28	<0.001	1.51	1.20, 1.91	<0.001	1.32	1.04, 1.67	0.025	1.39	1.09, 1.77	0.008
T2dm
No
Yes							0.89	0.72, 1.10	0.3	0.85	0.68, 1.05	0.13	0.86	0.70, 1.07	0.2	0.89	0.72, 1.11	0.3
Copd
No
Yes							1.14	0.91, 1.43	0.2	1.23	0.98, 1.54	0.08	1.19	0.94, 1.49	0.14	1.19	0.95, 1.50	0.13
Mi
No
Yes							1.06	0.82, 1.36	0.7	1.14	0.89, 1.47	0.3	1.11	0.86, 1.43	0.4	1.05	0.81, 1.36	0.7
Hf
No
Yes							1.24	1.01, 1.52	0.044	1.15	0.93, 1.42	0.2	1.16	0.94, 1.43	0.2	1.22	0.98, 1.51	0.069
WBC										1.01	1.00, 1.01	0.039	1	1.00, 1.01	0.3	1	1.00, 1.01	0.5
RBC										0.81	0.59, 1.10	0.2	0.87	0.64, 1.19	0.4	0.88	0.65, 1.20	0.4
PLT										1	1.00, 1.00	0.11	1	1.00, 1.00	0.6	1	1.00, 1.00	0.5
Cr										1.03	0.96, 1.11	0.4	1	0.93, 1.08	>0.9	0.98	0.91, 1.06	0.6
BUN										1.01	1.00, 1.01	0.026	1	1.00, 1.01	0.083	1	1.00, 1.01	0.091
Na										0.97	0.96, 0.98	<0.001	0.97	0.96, 0.98	<0.001	0.97	0.96, 0.98	<0.001
Hb										0.98	0.88, 1.09	0.7	0.96	0.86, 1.07	0.5	0.96	0.86, 1.07	0.4
Calcium										1.19	1.09, 1.30	<0.001	1.21	1.10, 1.32	<0.001	1.19	1.09, 1.30	<0.001
Hr													1.01	1.00, 1.01	0.004	1.01	1.00, 1.01	0.003
Nbpm													1	1.00, 1.00	0.6	1	1.00, 1.00	0.6
Rr													1	0.99, 1.02	0.7	1	0.99, 1.02	0.5
Spo2													1	0.99, 1.01	0.7	1	0.99, 1.01	0.7
Temperaturef													1.01	0.98, 1.04	0.5	1.01	0.98, 1.05	0.5
Sofa													1.07	1.04, 1.11	<0.001	1.06	1.03, 1.10	<0.001
Gcs													1.01	0.98, 1.04	0.7	1	0.98, 1.03	0.8
Vasopressor
1
No																0.66	0.49, 0.90	0.008
Glucocorticoids
1
No																0.88	0.73, 1.07	0.2
Antihypertensive
1
No																2.02	1.61, 2.53	<0.001
Legend: The lowest LAR tertile was used as the reference group. Hazard ratios were estimated across unadjusted and progressively adjusted Cox models.

## Sheet: Supplementary Table S6
Supplementary Table S6. Model-fit indices for latent growth mixture modeling of 7-day LAR trajectories.
Model	Classes	logLik	npm	AIC	BIC	SABIC	pct_class1	pct_class2	pct_class3	Entropy	avg_postprob1	avg_postprob2	avg_postprob3
m1	1	-1664.32	6	3340.65	3366.08945668497	3313.74	100
m2	2	-1664.32	9	3346.65	3384.81033549324	3306.28	53.9961013645224	46.0038986354776		0.5054	0.5108	0.5126
m3	3	-1641.55	12	3307.1	3357.9846012245	3253.28	48.1481481481481	42.1052631578947	9.74658869395711	0.857	0.7818	0.7874	0.9045
Legend: Model selection was based on AIC, BIC, sample-size-adjusted BIC, entropy, class proportions, and average posterior probabilities. The three-class model was selected as the optimal solution.
